# Supplementary material for: Hemilabile silver(i) complexes containing pyridyl chalcogenolate (S, Se) ligands and their utility as molecular precursors for silver chalcogenides
Source: Royal Society of Chemistry journal article supplement (doi:10.1039/c5ce00626k), 2015-01-01
Supplement: c5ce00626k1.pdf [file c5ce00626k1.pdf]

*Supporting Information*

**Hemilabile silver(I) complexes containing pyridyl chalcogenolate (S, Se) ligands and their utility as molecular precursors for silver chalcogenide**

Goutam Kumar Kole<sup>a</sup>, K. V. Vivekananda<sup>a</sup>, Mukesh Kumar<sup>b</sup>, Rakesh Ganguly<sup>c</sup>, Sandip Dey<sup>a</sup> and Vimal K. Jain<sup>a,\*</sup>

<sup>a</sup>Chemistry Division, <sup>b</sup>Solid State Physics Division, Bhabha Atomic Research Centre, Mumbai 400085, India

Email: [jainvk@barc.gov.in](mailto:jainvk@barc.gov.in); Tel: +91 22 2559 5095; Fax: +91 022 2550 5151

<sup>c</sup>Division of Chemical and Biological Sciences, School of Physical and Mathematical Sciences, Nanyang Technological University, Singapore – 637371

Table S1: Parameters for hydrogen bonding and other weak interactions in **1**.

| D-H...A            | D(D-H) (Å) | D(H...A) (Å) | D(D...A) (Å) | <(DHA) (°) | Symmetry Operator |
|--------------------|------------|--------------|--------------|------------|-------------------|
| N(1)-H(1N)...N(1)  | 0.76(6)    | 1.90(6)      | 2.656(3)     | 176(7)     | 1-x,y,1/2-z       |
| C(16)-H(16)...S(1) | 0.95(1)    | 2.91(1)      | 3.673(6)     | 138.1(1)   | 2-x, 1-y, 1-z     |

Table S2: Parameters for hydrogen bonding in **4**.

| D-H...A           | D(D-H) (Å) | D(H...A) (Å) | D(D...A) (Å) | <(DHA) (°) | Symmetry Operator |
|-------------------|------------|--------------|--------------|------------|-------------------|
| O(2)-H(2A)...N(2) | 0.85       | 2.08         | 2.86(2)      | 151.72     | -                 |
| O(2)-H(2B)...O(1) | 0.85       | 2.08         | 2.59(3)      | 118.16     | -                 |

Table S3: Parameters for hydrogen bonding in **5**.

| D-H...A            | D(D-H) (Å) | D(H...A) (Å) | D(D...A) (Å) | <(DHA) (°) | Symmetry Operator |
|--------------------|------------|--------------|--------------|------------|-------------------|
| O(1)-H(1)...O(2)   | 0.82       | 1.94         | 2.755(16)    | 175.81     | 2-x, 1-y, 1-z     |
| O(2)-H(2A)...N1    | 0.82       | 1.95         | 2.749(14)    | 164.8      | 1+x, y, z         |
| C(47)-H(47)...O(1) | 0.93       | 2.39         | 3.268(16)    | 156.25     | 2-x, -y, 1-z      |

Table S4: Parameters for hydrogen bonding and weak interactions in **6**.

| D-H...A                              | D(D-H) (Å) | D(H...A)<br>(Å) | D(D...A) (Å) | <(DHA) (°) | Symmetry<br>Operator |
|--------------------------------------|------------|-----------------|--------------|------------|----------------------|
| O(60)-H(60)...N1                     | 0.82       | 2.20            | 2.98(2)      | 158.61     | -                    |
| C(19)-H(19)...S1<br>(intramolecular) | 0.93       | 2.75            | 3.57(12)     | 147.96     | -                    |
| C(33)-H(33)...S1                     | 0.93       | 2.96(6)         | 3.84(6)      | 158.54     | -                    |

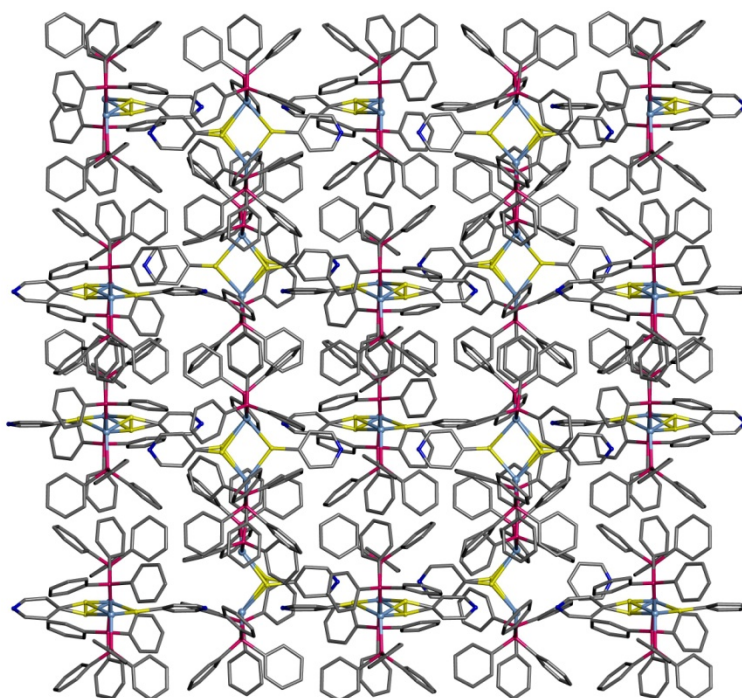

Figure S1: Packing diagram of **2**, viewed along *a*-axis.

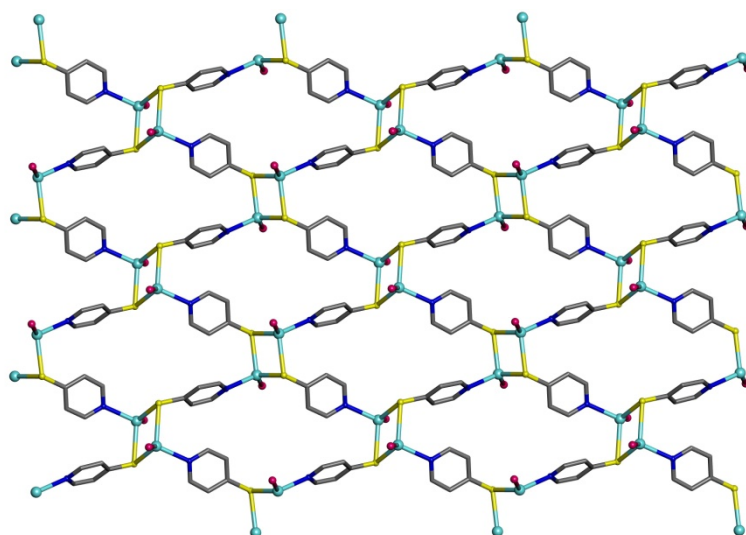

Figure S2: Two dimensional network structure of **3**. The phenyl rings of PPh<sub>3</sub> were omitted for clarity. Considering the centroids of the Ag<sub>2</sub>S<sub>2</sub> rings as node, the coordination polymer can be approximated as (4,4) connected network.

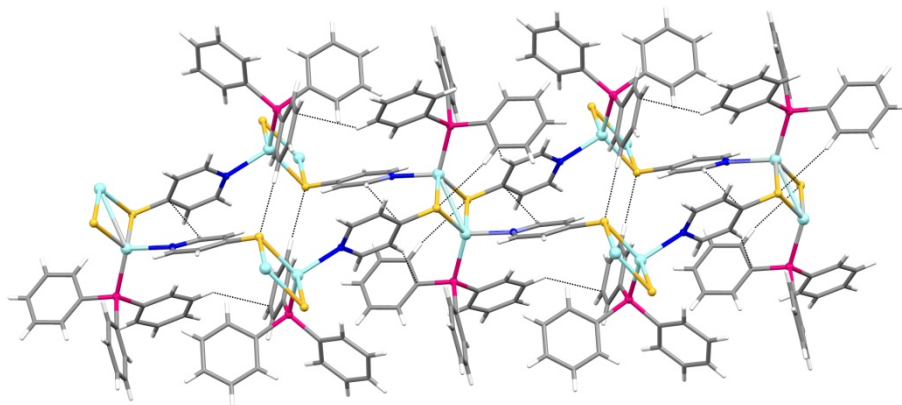

Figure S3: The weak C-H...S and C-H...C( $\pi$ ) interactions in the polymeric network of **3**.

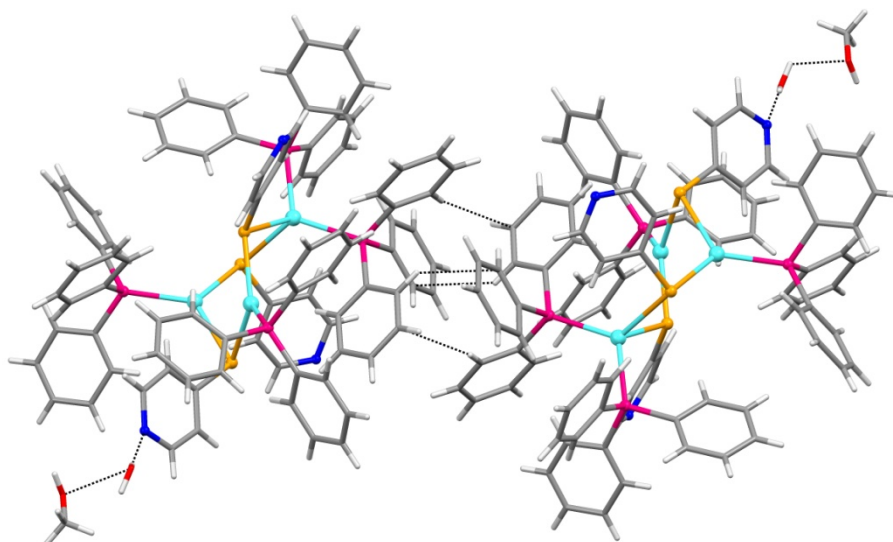

Figure S4: Intermolecular interactions in **4**, O-H...N and O-H...O hydrogen bonding and weak C-H...C( $\pi$ ) interactions.

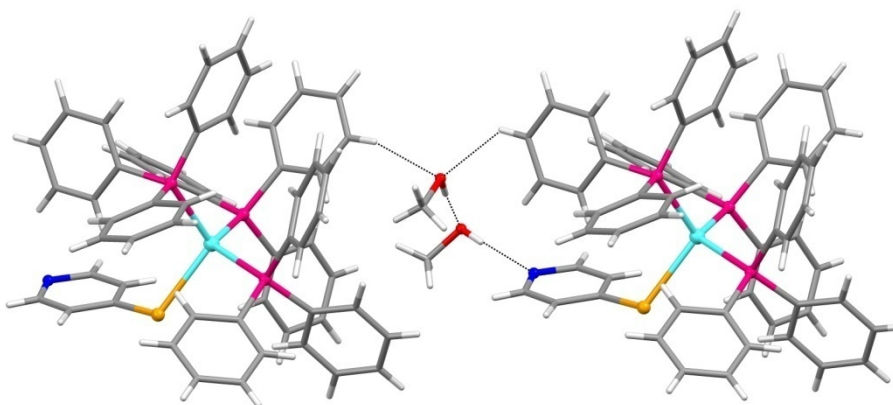

Figure S5: Intermolecular O-H...N, O-H...O and weak C-H...O hydrogen bonding interactions in **5**.

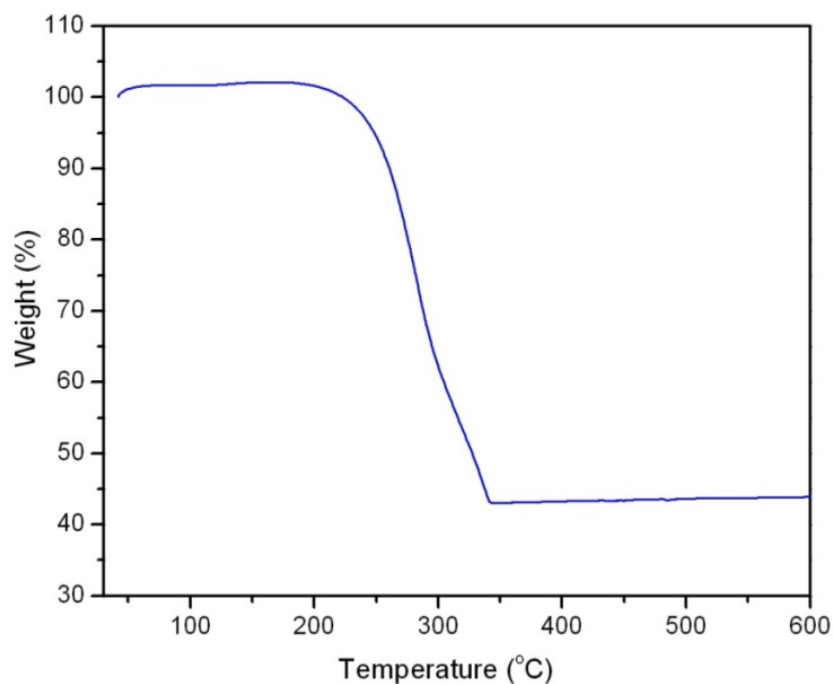

Figure S6: TGA plot of **1**. Total weight loss is 58.7%, not matching for the formation of  $\text{Ag}_2\text{S}$ .

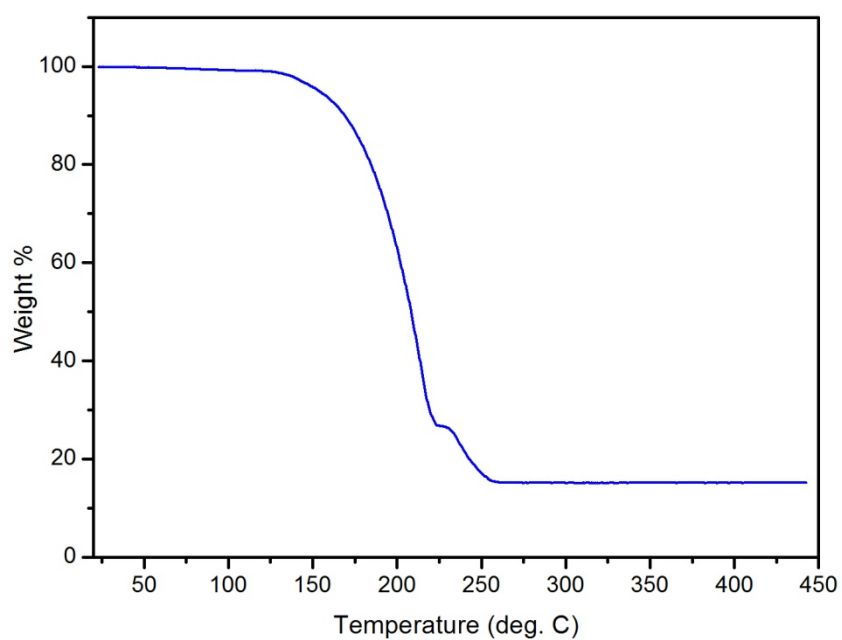

Figure S7: TGA plot for **2**. The weight loss occurs in two steps. The first step is for four  $\text{PPh}_3$  molecules (observed 72.5 %, calculated 70.5%) and second step is for one  $\text{pyS}$  and sulfur (observed 11.4% calculated 12.6%). The remaining weight is 16.8% which corresponds to the formation of  $\text{Ag}_2\text{S}$  (calculated value is 16.7%).

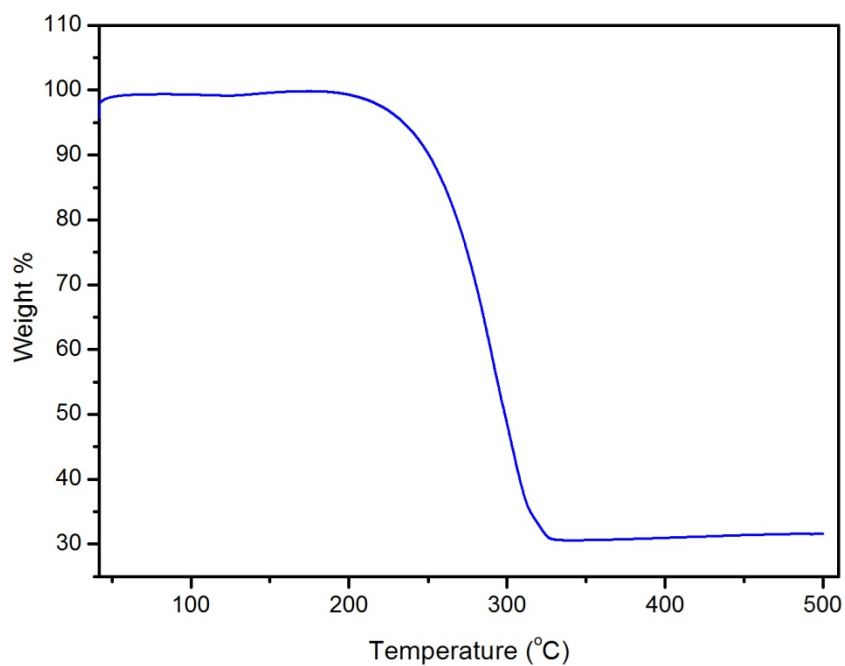

Figure S8: TGA plot for **3**. The weight loss in single step is 69%, which is not exactly matching for the formation of  $\text{Ag}_2\text{S}$ .

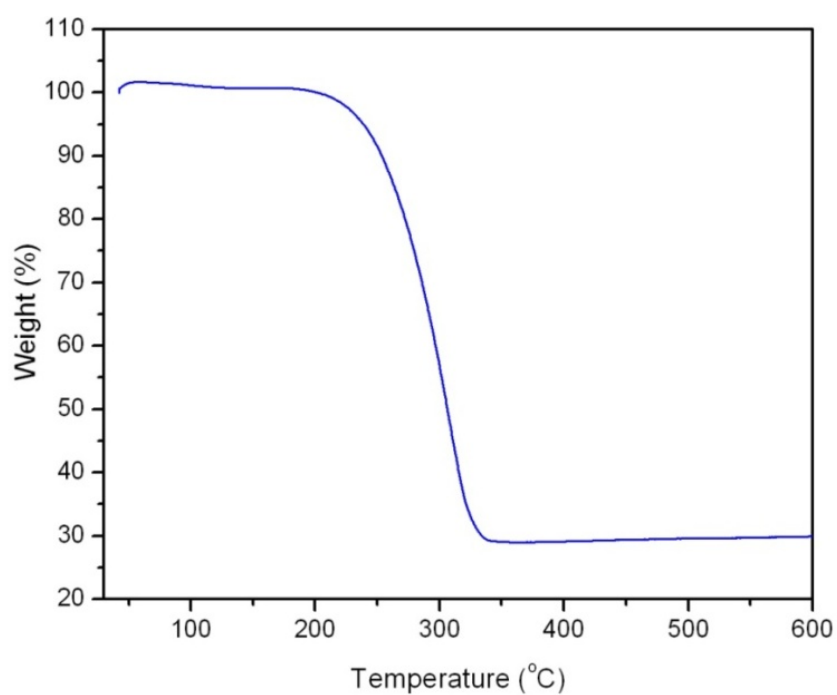

Figure S9: TGA plot for **4**. The residue after decomposition is ~ 28% of the sample used. 24% weight should remain in accordance with  $\text{Ag}_2\text{Se}$  formation.

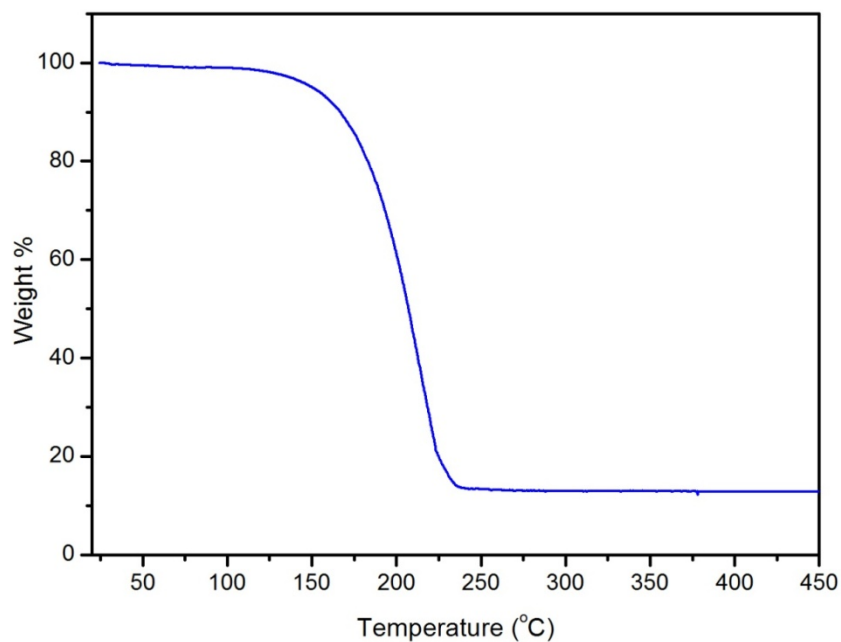

Figure S10: TGA plot for **5**. The weight loss or the decomposition of this complex occurs in single step. The observed weight loss is 86%. The remaining material (14%) corresponds to the formation of  $\text{Ag}_2\text{Se}$  (calculated residue weight 14.0%).

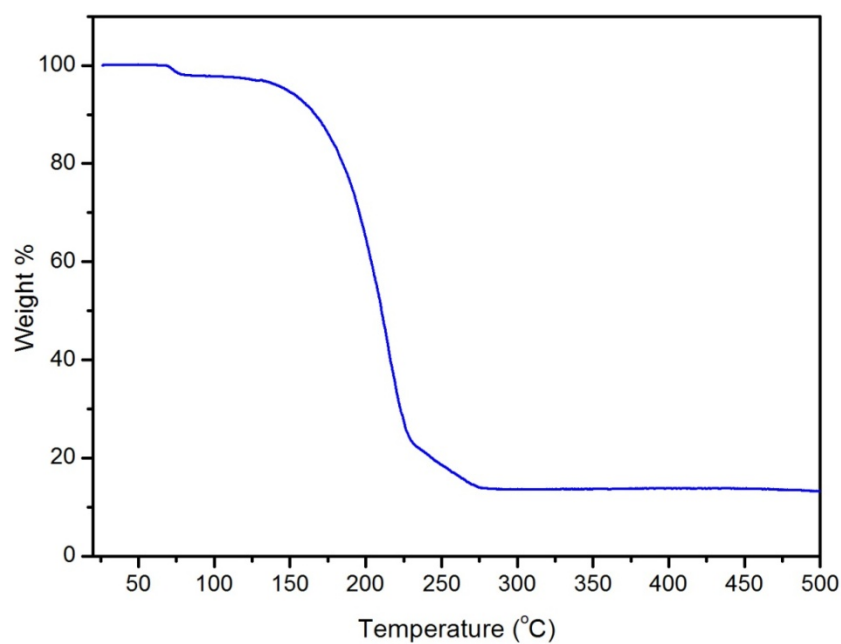

Figure S11: TGA plot for **6**·MeOH. The weight loss of 2.3% observed at 70°C is due to the loss of lattice methanol molecule. The total weight loss is 90.7%. In order to form  $\text{Ag}_2\text{S}$  upon decomposition, the remaining weight should be 12%. The observed remaining weight of 9.3% corresponds to the formation of elemental silver (calculated value 10.4%).

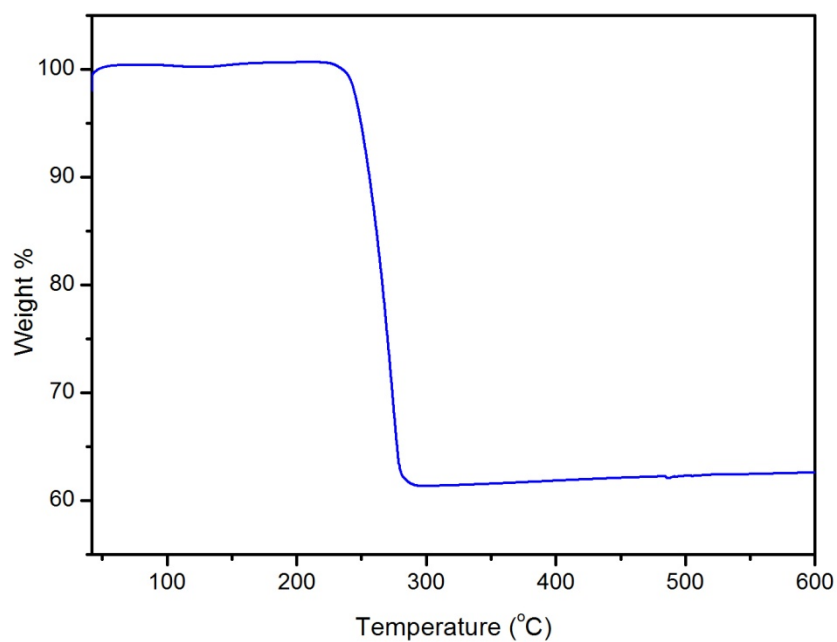

Figure S12: TGA plot for **7a**. The observed weight loss is 39.1% of the sample used. The calculated weight loss would be 43.1% in accordance with  $\text{Ag}_2\text{S}$  formation.

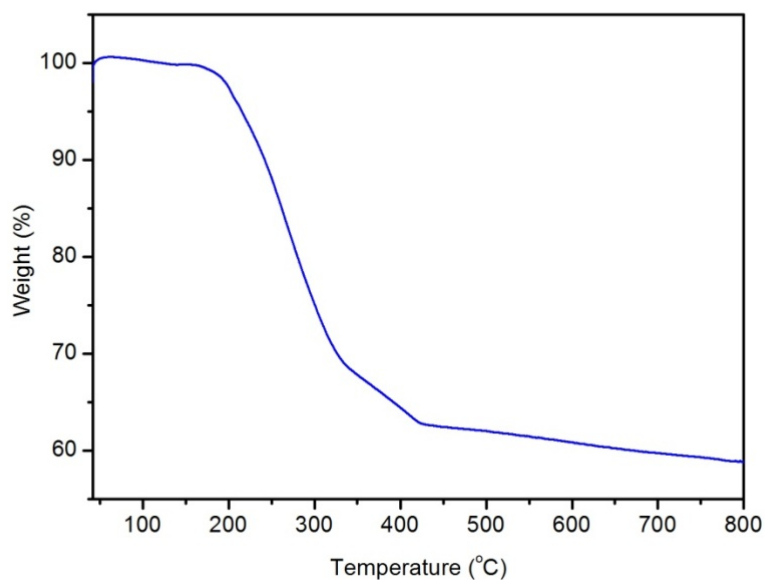

Figure S13: TGA plot for **7b**. Thermal decomposition leads to the formation of  $\text{Ag}_2\text{Se}$ . The residue after decomposition is ~ 59% of the sample used. 55.5% weight should remain in accordance with  $\text{Ag}_2\text{Se}$  formation.



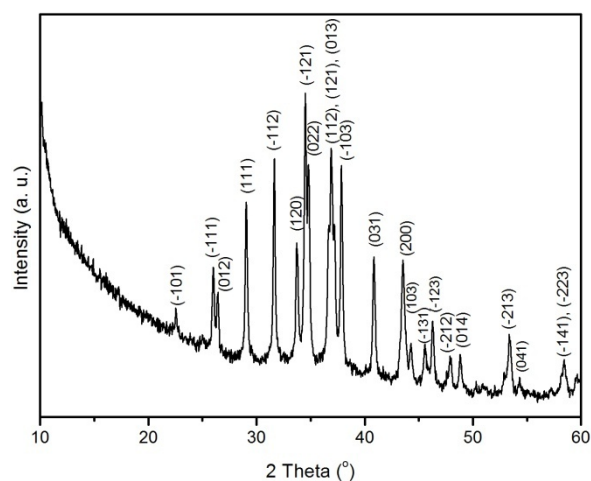

Figure S14: PXRD pattern of  $\text{Ag}_2\text{S}$  obtained by thermolysis of **7a** in the solid state

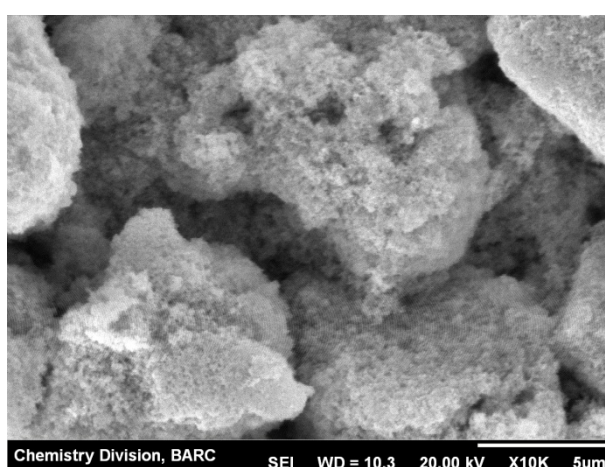

Figure S15: SEM images of  $\text{Ag}_2\text{S}$  obtained by solid state pyrolysis of **7a**. The particles are found to be agglomerated. The Ag/S ratio in the EDX analysis was found to be 63.77 / 36.23.

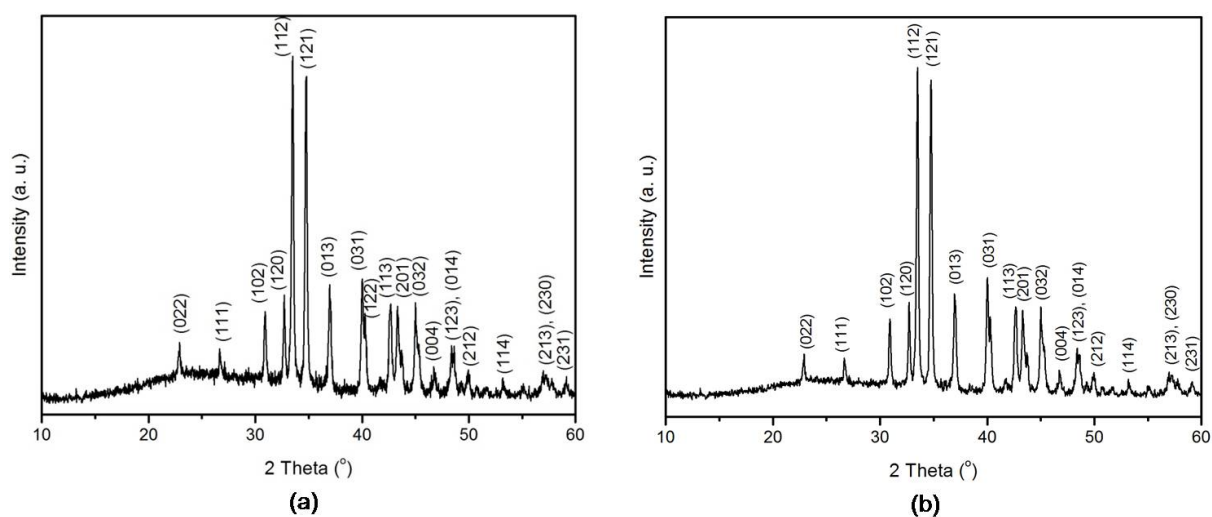

Figure S16: The PXRD pattern of the  $\text{Ag}_2\text{Se}$  obtained by (a) thermolysis of **4** in HDA at 270 °C and (b) solid state pyrolysis of **5**.

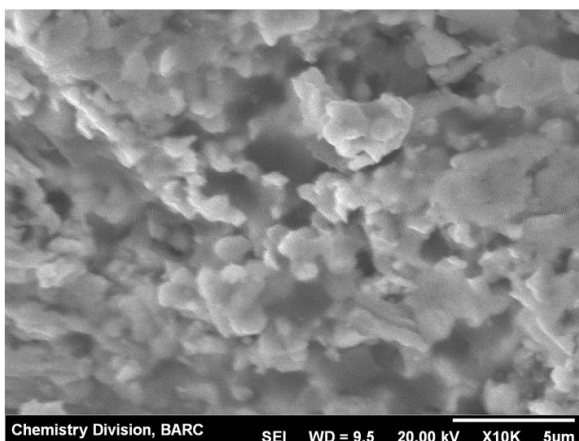

(a)

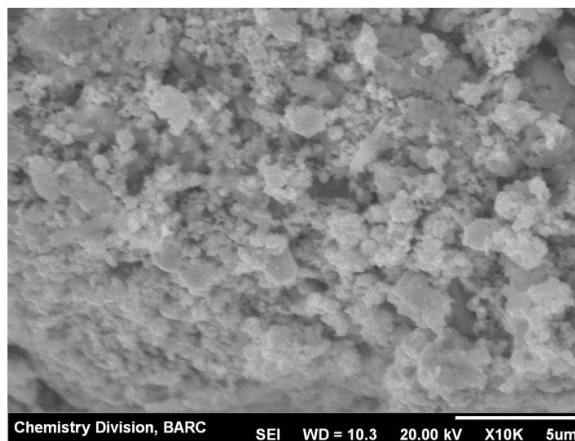

(b)

Figure S17: SEM images of  $\text{Ag}_2\text{Se}$  obtained by (a) thermolysis of **4** in HDA at 270 °C and (b) solid state pyrolysis of **5**. The particles are found to be agglomerated. The Ag / Se ratio in EDX analysis were found to be (a) 66.97 / 33.03 and (b) 69.96 / 33.04.
